# Supplementary material for: The rationality of M&A targets in the choice of payment methods
Source: Springer Nature journal article supplement (doi:10.1007/s11846-021-00469-6), 2021-05-20
Supplement: MOESM1 [file 11846_2021_469_MOESM1_ESM.docx]

# Online Appendix: Robustness Tests

In order to check the robustness of our results, we apply several tests. First, we alter the regression model applied. Table A.1 presents the results of logit regressions on the dependent variable *Binary Cash Payment*. This variable equals 1 if the transaction is solely financed with cash and 0 otherwise. The results for both acquirers and targets are in line with the main results.

[INSERT TABLE A.1 ABOUT HERE]

Second, we exclude the financial sector (approximately 21% of the observations) from the sample. Tables A.2 shows that most acquirers’ and targets’ main results stay robust and support our main findings.

[INSERT TABLE A.2 ABOUT HERE]

We further examine the robustness of our results by testing alternative explanations, in specific, whether acquirers prefer stock payment when they face financial constraints. Following Kaplan and Zingles (1997), we calculate acquirers’ financial constraints by cash flow in the previous year divided by property, plant, and equipment (PPE) in the transaction year as a proxy. Besides, we also control the pre-M&A debt ratio by total debt divided by total assets to examine if acquirers face high interests payment or have less possibility to take more debt to finance M&A with cash. In Table A.3, we find that variables *Financial Constraints* and *Pre-M&A Debt Ratio* are not significant and our main results stay mostly consistent.

[INSERT TABLE A.3 ABOUT HERE]

In addition, Moeller et al. (2007) and Officer et al. (2009) show that the counterparty’s idiosyncratic volatility can serve as a proxy for the difficulty to correctly evaluate its intrinsic value. We calculate the relative idiosyncratic volatility following Aabo et al. (2017) by the ratio of idiosyncratic volatility to total volatility as: , equivalently one minus R-squared of the market model. In Table A.4, the idiosyncratic risk of both parties is insignificant with payment methods when we control overvaluation or misvaluation indicators and our main findings stay mostly robust.

[INSERT TABLE A.4 ABOUT HERE]

Table A.1. Robustness for logit regression

This table presents the results of logit regressions on all-cash payment (1), otherwise 0. Robust z-statistics are given in parentheses. Statistical significance at the 1%, 5%, and 10% levels are indicated by ***, **, and *, respectively.

|  | Model (1) | Model (2) | Model (3) | Model (4) | Model (5) | Model (6) | Model (7) |
| --- | --- | --- | --- | --- | --- | --- | --- |
| ***Acquirers’ Valuation*** | | | | | | | |
| Acq. MI – Overvaluation | -0.072 |  |  |  |  |  |  |
|  | (-0.102) |  |  |  |  |  |  |
| Acq. |EXVIA| |  | 1.480*** |  |  |  |  |  |
|  |  | (3.841) |  |  |  |  |  |
| Acq. MI – Mispricing |  |  | 0.976* |  |  |  |  |
|  |  |  | (1.715) |  |  |  |  |
| ***Targets’ Valuation*** |  |  |  |  |  |  |  |
| Tar. MI – Overvaluation |  |  |  | 0.518 |  |  |  |
|  |  |  |  | (0.412) |  |  |  |
| Tar. |EXVIA| |  |  |  |  | 1.955 |  |  |
|  |  |  |  |  | (1.373) |  |  |
| Tar. MI – Mispricing |  |  |  |  |  | 2.467* |  |
|  |  |  |  |  |  | (1.888) |  |
| ***Asymmetric Information*** | | | | | | | |
| Rel. |EXVIA| |  |  |  |  |  |  | 2.626*** |
|  |  |  |  |  |  |  | (2.999) |
| Cross-industry | 0.532*** | 0.565*** | 0.537*** | 0.201 | 0.275 | 0.219 | 0.358 |
|  | (3.118) | (3.256) | (3.140) | (0.529) | (0.741) | (0.603) | (0.971) |
| Cross-border | 0.387 | 0.362 | 0.373 | 0.883 | 0.923 | 1.062* | 0.779 |
|  | (1.618) | (1.531) | (1.575) | (1.483) | (1.456) | (1.840) | (1.271) |
| Unlisted Target | 0.969*** | 0.996*** | 0.980*** |  |  |  |  |
|  | (5.457) | (5.594) | (5.539) |  |  |  |  |
| ***Acquirers’ Financials*** | | | | | | | |
| (ln) Tot. Ass. | 0.894*** | 0.964*** | 0.947*** | 1.723*** | 1.573*** | 1.726*** | 1.969*** |
|  | (4.142) | (4.364) | (4.266) | (2.865) | (2.723) | (2.987) | (3.448) |
| Divd./Tot. Ass. | -0.348* | -0.477** | -0.389* | -0.148 | -0.163 | -0.151 | -0.113 |
|  | (-1.666) | (-2.554) | (-1.872) | (-0.246) | (-0.264) | (-0.271) | (-0.191) |
| Leverage | 1.977** | 2.308*** | 1.969** | 7.008 | 8.270 | 6.511 | 8.474 |
|  | (2.295) | (2.708) | (2.336) | (1.064) | (1.285) | (1.011) | (1.430) |
| Collateral | 0.274* | 0.275* | 0.268 | 0.814* | 0.785* | 0.848** | 0.698* |
|  | (1.654) | (1.685) | (1.635) | (1.909) | (1.818) | (1.971) | (1.696) |
| Return-on-equity | 0.464 | 0.774** | 0.494 | -0.469 | -0.327 | -0.431 | 0.427 |
|  | (1.373) | (2.252) | (1.500) | (-0.477) | (-0.340) | (-0.464) | (0.410) |
| Market-to-book | 0.018 | 0.020 | 0.014 | -0.006 | -0.006 | -0.006 | 0.001 |
|  | (1.074) | (1.241) | (0.850) | (-0.190) | (-0.163) | (-0.185) | (0.047) |
| Closely Held Shares | -0.018*** | -0.021*** | -0.019*** | -0.007 | -0.008 | -0.004 | -0.014 |
|  | (-3.408) | (-3.894) | (-3.504) | (-0.536) | (-0.661) | (-0.318) | (-1.034) |
| ***Deal Information*** | | | | | | | |
| Relative Deal Value | -1.996*** | -2.008*** | -1.877*** | -3.812** | -4.253** | -3.641** | -3.268* |
|  | (-3.768) | (-3.818) | (-3.509) | (-2.062) | (-2.252) | (-2.014) | (-1.936) |
| (ln) Deal Value | -1.528*** | -1.581*** | -1.576*** | -2.213*** | -2.029*** | -2.242*** | -2.388*** |
|  | (-6.215) | (-6.405) | (-6.298) | (-3.381) | (-3.258) | (-3.581) | (-3.971) |
| CAR [-40; -1] | -1.103 | -1.417 | -1.207 | -1.321 | -1.579 | -1.035 | -2.198 |
|  | (-1.064) | (-1.339) | (-1.152) | (-0.689) | (-0.803) | (-0.531) | (-1.128) |
|  |  |  |  |  |  |  |  |
| Year Fixed | Yes | Yes | Yes | Yes | Yes | Yes | Yes |
| Industry Fixed | Yes | Yes | Yes | Yes | Yes | Yes | Yes |
| Constant | -4.010** | -5.330*** | -4.834** | -10.319** | -10.311** | -11.188** | -15.037*** |
|  | (-2.161) | (-2.776) | (-2.465) | (-2.166) | (-2.251) | (-2.427) | (-3.064) |
| Observations | 1,150 | 1,150 | 1,150 | 329 | 341 | 333 | 341 |
| Pseudo R2 | 0.300 | 0.313 | 0.302 | 0.454 | 0.467 | 0.454 | 0.486 |

Table A.2. Robustness excluding the financial sector

This table presents the results of Tobit regressions on the percentage of cash applied to finance M&A. Robust t-statistics are given in parentheses. Statistical significance at the 1%, 5%, and 10% levels are indicated by ***, **, and *, respectively.

|  | Model (1) | Model (2) | Model (3) | Model (4) | Model (5) | Model (6) | Model (7) |
| --- | --- | --- | --- | --- | --- | --- | --- |
| ***Acquirers’ Valuation*** | | | | | | | |
| Acq. MI – Overvaluation | -0.587 |  |  |  |  |  |  |
|  | (-1.527) |  |  |  |  |  |  |
| Acq. |EXVIA| |  | 1.067*** |  |  |  |  |  |
|  |  | (4.722) |  |  |  |  |  |
| Acq. MI – Mispricing |  |  | 0.590* |  |  |  |  |
|  |  |  | (1.760) |  |  |  |  |
| ***Targets’ Valuation*** |  |  |  |  |  |  |  |
| Tar. MI – Overvaluation |  |  |  | 0.384 |  |  |  |
|  |  |  |  | (0.642) |  |  |  |
| Tar. |EXVIA| |  |  |  |  | -0.105 |  |  |
|  |  |  |  |  | (-0.190) |  |  |
| Tar. MI – Mispricing |  |  |  |  |  | 0.135 |  |
|  |  |  |  |  |  | (0.238) |  |
| ***Asymmetric Information*** | | | | | | | |
| Rel. |EXVIA| |  |  |  |  |  |  | 1.273*** |
|  |  |  |  |  |  |  | (3.620) |
| Cross-industry | -0.092 | -0.078 | -0.091 | -0.143 | -0.099 | -0.113 | -0.030 |
|  | (-0.959) | (-0.840) | (-0.956) | (-0.853) | (-0.587) | (-0.690) | (-0.191) |
| Cross-border | 0.008 | -0.037 | -0.003 | 0.393 | 0.392 | 0.396 | 0.362 |
|  | (0.059) | (-0.295) | (-0.025) | (1.628) | (1.575) | (1.623) | (1.526) |
| Unlisted Target | 0.420*** | 0.438*** | 0.435*** |  |  |  |  |
|  | (4.003) | (4.246) | (4.136) |  |  |  |  |
| ***Acquirers’ Financials*** | | | | | | | |
| (ln) Tot. Ass. | 0.486*** | 0.611*** | 0.502*** | 1.272*** | 1.224*** | 1.204*** | 1.296*** |
|  | (3.715) | (4.398) | (3.766) | (4.321) | (4.128) | (4.254) | (4.415) |
| Divd./Tot. Ass. | 0.029 | -0.008 | -0.020 | 0.415** | 0.434** | 0.391** | 0.392** |
|  | (0.227) | (-0.066) | (-0.162) | (2.278) | (2.317) | (2.176) | (2.231) |
| Leverage | -0.000 | 0.240 | 0.013 | 3.444 | 3.750 | 3.319 | 3.628 |
|  | (-0.000) | (0.522) | (0.027) | (1.184) | (1.264) | (1.154) | (1.377) |
| Collateral | 0.047 | 0.055 | 0.046 | 0.456** | 0.487** | 0.451** | 0.335* |
|  | (0.521) | (0.619) | (0.504) | (2.492) | (2.541) | (2.498) | (1.890) |
| Return-on-equity | -0.578** | -0.356 | -0.573** | -1.291*** | -1.251*** | -1.207*** | -0.535 |
|  | (-2.347) | (-1.470) | (-2.317) | (-2.987) | (-2.774) | (-2.880) | (-1.258) |
| Market-to-book | 0.007 | 0.006 | 0.003 | -0.015 | -0.015 | -0.014 | -0.007 |
|  | (0.829) | (0.804) | (0.366) | (-1.471) | (-1.452) | (-1.351) | (-0.692) |
| Closely Held Shares | -0.009*** | -0.010*** | -0.009*** | -0.003 | -0.005 | -0.002 | -0.008 |
|  | (-2.994) | (-3.442) | (-2.969) | (-0.473) | (-0.841) | (-0.430) | (-1.551) |
| ***Deal Information*** | | | | | | | |
| Relative Deal Value | -0.766** | -0.430 | -0.687** | -0.906 | -1.263* | -0.982 | -0.502 |
|  | (-2.326) | (-1.232) | (-2.017) | (-1.400) | (-1.964) | (-1.561) | (-0.742) |
| (ln) Deal Value | -0.884*** | -0.966*** | -0.902*** | -1.386*** | -1.314*** | -1.314*** | -1.388*** |
|  | (-5.687) | (-6.035) | (-5.730) | (-4.607) | (-4.414) | (-4.563) | (-4.707) |
| CAR [-40; -1] | -0.591 | -0.753 | -0.715 | -0.891 | -1.027 | -0.812 | -0.842 |
|  | (-1.196) | (-1.567) | (-1.445) | (-1.075) | (-1.203) | (-0.987) | (-1.029) |
|  |  |  |  |  |  |  |  |
| Year Fixed | Yes | Yes | Yes | Yes | Yes | Yes | Yes |
| Industry Fixed | Yes | Yes | Yes | Yes | Yes | Yes | Yes |
| Constant | -0.516 | -2.396** | -1.128 | -7.330*** | -6.814*** | -6.919*** | -8.910*** |
|  | (-0.498) | (-2.110) | (-1.023) | (-3.204) | (-3.027) | (-3.172) | (-3.756) |
| Sigma | 0.898*** | 0.870*** | 0.898*** | 0.834*** | 0.855*** | 0.831*** | 0.798*** |
|  | (13.743) | (13.787) | (13.745) | (8.506) | (8.483) | (8.670) | (8.536) |
| Observations | 903 | 903 | 903 | 264 | 265 | 266 | 265 |
| Pseudo R2 | 0.257 | 0.276 | 0.267 | 0.379 | 0.369 | 0.369 | 0.403 |

Table A.3. Robustness including acquirers’ financial constraints

This table presents the results of Tobit regressions on the percentage of cash applied to finance M&A. Robust t-statistics are given in parentheses. Statistical significance at the 1%, 5%, and 10% levels are indicated by ***, **, and *, respectively.

|  | Model (1) | Model (2) | Model (3) | Model (4) | Model (5) | Model (6) | Model (7) |
| --- | --- | --- | --- | --- | --- | --- | --- |
| ***Acquirers’ Valuation*** | | | | | | | |
| Acq. MI – Overvaluation | -0.294 |  |  |  |  |  |  |
|  | (-0.786) |  |  |  |  |  |  |
| Acq. |EXVIA| |  | 0.954*** |  |  |  |  |  |
|  |  | (4.918) |  |  |  |  |  |
| Acq. MI – Mispricing |  |  | 0.502* |  |  |  |  |
|  |  |  | (1.748) |  |  |  |  |
| ***Targets’ Valuation*** |  |  |  |  |  |  |  |
| Tar. MI – Overvaluation |  |  |  | 0.065 |  |  |  |
|  |  |  |  | (0.128) |  |  |  |
| Tar. |EXVIA| |  |  |  |  | 0.914* |  |  |
|  |  |  |  |  | (1.905) |  |  |
| Tar. MI – Mispricing |  |  |  |  |  | 0.873* |  |
|  |  |  |  |  |  | (1.906) |  |
| ***Asymmetric Information*** | | | | | | | |
| Rel. |EXVIA| |  |  |  |  |  |  | 1.241*** |
|  |  |  |  |  |  |  | (4.724) |
| Cross-industry | 0.266*** | 0.268*** | 0.263*** | 0.191 | 0.219 | 0.182 | 0.234* |
|  | (3.116) | (3.208) | (3.084) | (1.397) | (1.595) | (1.392) | (1.793) |
| Cross-border | 0.217* | 0.169 | 0.207* | 0.606*** | 0.669*** | 0.680*** | 0.592*** |
|  | (1.820) | (1.450) | (1.731) | (2.633) | (2.835) | (2.998) | (2.642) |
| Unlisted Target | 0.651*** | 0.647*** | 0.657*** |  |  |  |  |
|  | (6.881) | (6.968) | (6.938) |  |  |  |  |
| ***Acquirers’ Financial Constraints*** | | | | | | | |
| Pre-M&A Debt Ratio | 0.223 | 0.466* | 0.167 | -0.159 | -0.375 | -0.334 | -0.249 |
|  | (0.775) | (1.684) | (0.622) | (-0.335) | (-0.775) | (-0.717) | (-0.546) |
| Financial Constraints | 0.021 | 0.008 | 0.020 | 0.009 | 0.011 | 0.014 | 0.006 |
|  | (1.292) | (0.512) | (1.289) | (0.342) | (0.448) | (0.561) | (0.261) |
| ***Acquirers’ Financials*** | | | | | | | |
| (ln) Tot. Ass. | 0.299*** | 0.351*** | 0.324*** | 0.440** | 0.436** | 0.473** | 0.608*** |
|  | (2.988) | (3.482) | (3.170) | (2.305) | (2.280) | (2.555) | (3.101) |
| Divd./Tot. Ass. | -0.126 | -0.156 | -0.152 | 0.191 | 0.187 | 0.155 | 0.199 |
|  | (-1.072) | (-1.377) | (-1.294) | (1.081) | (1.045) | (0.912) | (1.169) |
| Collateral | 0.371 | 0.603 | 0.362 | 2.125 | 2.340 | 1.849 | 2.462 |
|  | (0.830) | (1.369) | (0.821) | (0.780) | (0.859) | (0.707) | (0.978) |
| Return-on-equity | 0.170 | 0.261 | 0.177 | -0.187 | -0.003 | -0.135 | 0.284 |
|  | (0.909) | (1.412) | (0.950) | (-0.560) | (-0.008) | (-0.424) | (0.865) |
| Market-to-book | 0.012 | 0.012 | 0.009 | -0.002 | -0.001 | -0.000 | 0.004 |
|  | (1.439) | (1.489) | (1.099) | (-0.161) | (-0.065) | (-0.029) | (0.359) |
| Closely Held Shares | -0.008*** | -0.009*** | -0.008*** | -0.001 | -0.003 | -0.000 | -0.006 |
|  | (-2.859) | (-3.415) | (-2.893) | (-0.278) | (-0.582) | (-0.059) | (-1.304) |
| ***Deal Information*** | | | | | | | |
| Relative Deal Value | -1.117*** | -1.021*** | -1.047*** | -1.458*** | -1.527*** | -1.275** | -1.124** |
|  | (-4.206) | (-3.845) | (-3.888) | (-2.677) | (-2.801) | (-2.439) | (-2.111) |
| (ln) Deal Value | -0.490*** | -0.520*** | -0.515*** | -0.507** | -0.483** | -0.521*** | -0.609*** |
|  | (-4.239) | (-4.525) | (-4.388) | (-2.590) | (-2.478) | (-2.775) | (-3.118) |
| CAR [-40; -1] | -0.699 | -0.850* | -0.772* | -0.518 | -0.455 | -0.472 | -0.465 |
|  | (-1.499) | (-1.870) | (-1.661) | (-0.723) | (-0.624) | (-0.685) | (-0.661) |
|  |  |  |  |  |  |  |  |
| Year Fixed | Yes | Yes | Yes | Yes | Yes | Yes | Yes |
| Industry Fixed | Yes | Yes | Yes | Yes | Yes | Yes | Yes |
| Constant | -0.255 | -1.373 | -0.772 | -1.664 | -2.253 | -2.356 | -4.531*** |
|  | (-0.298) | (-1.558) | (-0.856) | (-1.030) | (-1.373) | (-1.514) | (-2.643) |
| Sigma | 0.957*** | 0.931*** | 0.956*** | 0.865*** | 0.873*** | 0.837*** | 0.822*** |
|  | (16.569) | (16.613) | (16.573) | (10.550) | (10.532) | (10.845) | (10.596) |
| Observations | 1,148 | 1,148 | 1,148 | 337 | 341 | 341 | 341 |
| Pseudo R2 | 0.250 | 0.265 | 0.257 | 0.329 | 0.332 | 0.331 | 0.365 |

Table A.4. Robustness including idiosyncratic risk

This table presents the results of Tobit regressions on the percentage of cash applied to finance M&A. Robust t-statistics are given in parentheses. Statistical significance at the 1%, 5%, and 10% levels are indicated by ***, **, and *, respectively.

|  | Model (1) | Model (2) | Model (3) | Model (4) | Model (5) | Model (6) | Model (7) |
| --- | --- | --- | --- | --- | --- | --- | --- |
| ***Acquirers’ Valuation*** | | | | | | | |
| Acq. MI – Overvaluation | -0.272 |  |  |  |  |  |  |
|  | (-0.760) |  |  |  |  |  |  |
| Acq. |EXVIA| |  | 0.881*** |  |  |  |  |  |
|  |  | (4.663) |  |  |  |  |  |
| Acq. MI – Mispricing |  |  | 0.445 |  |  |  |  |
|  |  |  | (1.354) |  |  |  |  |
| ***Targets’ Valuation*** |  |  |  |  |  |  |  |
| Tar. MI – Overvaluation |  |  |  | 0.272 |  |  |  |
|  |  |  |  | (0.498) |  |  |  |
| Tar. |EXVIA| |  |  |  |  | 0.621 |  |  |
|  |  |  |  |  | (1.210) |  |  |
| Tar. MI – Mispricing |  |  |  |  |  | 0.480 |  |
|  |  |  |  |  |  | (1.024) |  |
| ***Asymmetric Information*** | | | | | | | |
| Rel. |EXVIA| |  |  |  |  |  |  | 0.971*** |
|  |  |  |  |  |  |  | (3.574) |
| Cross-industry | 0.217** | 0.224*** | 0.215** | 0.094 | 0.094 | 0.100 | 0.142 |
|  | (2.464) | (2.595) | (2.443) | (0.646) | (0.655) | (0.728) | (1.027) |
| Cross-border | 0.224* | 0.182 | 0.210* | 0.756*** | 0.749*** | 0.779*** | 0.619** |
|  | (1.814) | (1.503) | (1.701) | (2.718) | (2.747) | (2.902) | (2.392) |
| Unlisted Target | 0.658*** | 0.657*** | 0.663*** |  |  |  |  |
|  | (6.730) | (6.815) | (6.770) |  |  |  |  |
| ***Idiosyncratic Risk*** | | | | | | | |
| Acq. RIV | -0.290 | -0.396 | -0.295 |  |  |  |  |
|  | (-0.977) | (-1.355) | (-0.995) |  |  |  |  |
| Tar. RIV |  |  |  | 0.302 | 0.351 | 0.266 | 0.444 |
|  |  |  |  | (0.539) | (0.630) | (0.495) | (0.826) |
| ***Acquirers’ Financials*** | | | | | | | |
| (ln) Tot. Ass. | 0.329*** | 0.362*** | 0.350*** | 0.465** | 0.470** | 0.448** | 0.587*** |
|  | (3.234) | (3.538) | (3.365) | (2.213) | (2.263) | (2.249) | (2.764) |
| Divd./Tot. Ass. | -0.064 | -0.120 | -0.090 | 0.163 | 0.174 | 0.135 | 0.176 |
|  | (-0.587) | (-1.132) | (-0.814) | (0.936) | (1.008) | (0.805) | (1.057) |
| Collateral | 0.237 | 0.495 | 0.236 | 3.781 | 3.984 | 3.615 | 3.784 |
|  | (0.530) | (1.119) | (0.533) | (1.340) | (1.426) | (1.338) | (1.448) |
| Return-on-equity | 0.206 | 0.382** | 0.192 | -0.160 | -0.073 | -0.134 | 0.156 |
|  | (1.207) | (2.259) | (1.151) | (-0.459) | (-0.215) | (-0.409) | (0.468) |
| Market-to-book | 0.009 | 0.010 | 0.006 | -0.006 | -0.006 | -0.004 | -0.002 |
|  | (1.100) | (1.321) | (0.790) | (-0.573) | (-0.647) | (-0.462) | (-0.177) |
| Closely Held Shares | -0.008*** | -0.009*** | -0.008*** | 0.000 | -0.000 | 0.001 | -0.003 |
|  | (-2.954) | (-3.443) | (-2.982) | (0.088) | (-0.060) | (0.206) | (-0.717) |
| ***Deal Information*** | | | | | | | |
| Relative Deal Value | -0.972*** | -0.954*** | -0.911*** | -1.522** | -1.477** | -1.444** | -1.218** |
|  | (-3.613) | (-3.533) | (-3.332) | (-2.577) | (-2.523) | (-2.578) | (-2.114) |
| (ln) Deal Value | -0.528*** | -0.538*** | -0.550*** | -0.532** | -0.551** | -0.503** | -0.633*** |
|  | (-4.439) | (-4.566) | (-4.560) | (-2.447) | (-2.545) | (-2.447) | (-2.908) |
| CAR [-40; -1] | -0.807* | -0.960** | -0.883* | -0.392 | -0.352 | -0.367 | -0.429 |
|  | (-1.662) | (-2.016) | (-1.820) | (-0.521) | (-0.470) | (-0.508) | (-0.587) |
|  |  |  |  |  |  |  |  |
| Year Fixed | Yes | Yes | Yes | Yes | Yes | Yes | Yes |
| Industry Fixed | Yes | Yes | Yes | Yes | Yes | Yes | Yes |
| Constant | -0.166 | -1.003 | -0.615 | -2.298 | -2.614 | -2.356 | -4.364** |
|  | (-0.183) | (-1.087) | (-0.648) | (-1.218) | (-1.391) | (-1.330) | (-2.251) |
| Sigma | 0.959*** | 0.936*** | 0.958*** | 0.788*** | 0.781*** | 0.762*** | 0.744*** |
|  | (16.030) | (16.070) | (16.033) | (9.333) | (9.336) | (9.661) | (9.382) |
| Observations | 1,087 | 1,087 | 1,087 | 250 | 250 | 254 | 250 |
| Pseudo R2 | 0.246 | 0.261 | 0.247 | 0.363 | 0.365 | 0.360 | 0.390 |
